# Supplementary material for: Analysis of chlorpyrifos and chlorpyrifos-methyl residues in multi-environmental media by cloud-point extraction and HPLC
Source: Royal Society of Chemistry journal article supplement (doi:10.1039/c3ay26623k), 2013-01-01
Supplement: c3ay26623k.pdf [file c3ay26623k.pdf]

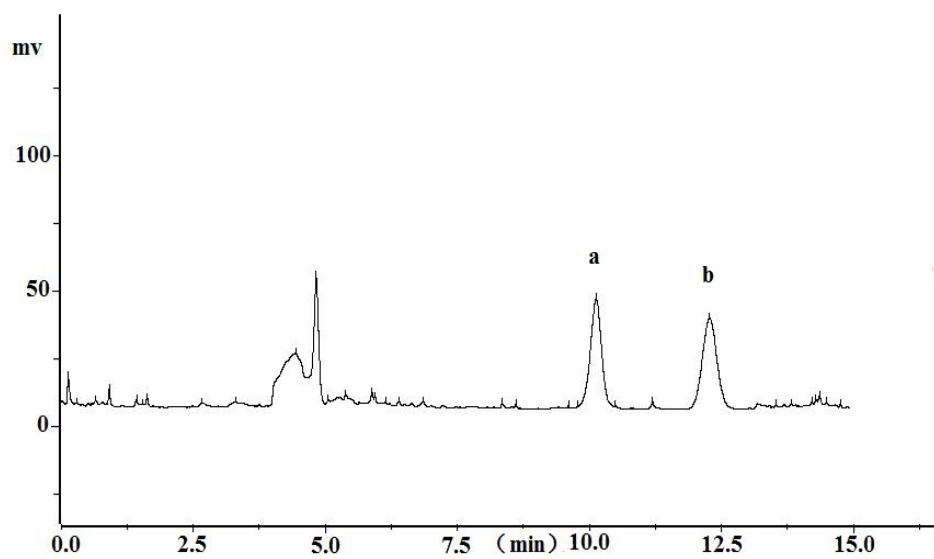

Supplemental Fig. S1. Chromatogram of the standard mixture of chlorpyrifos-methyl (a) and chlorpyrifos (b) ( $2.0 \text{ mg L}^{-1}$  each) without CPE treatment.

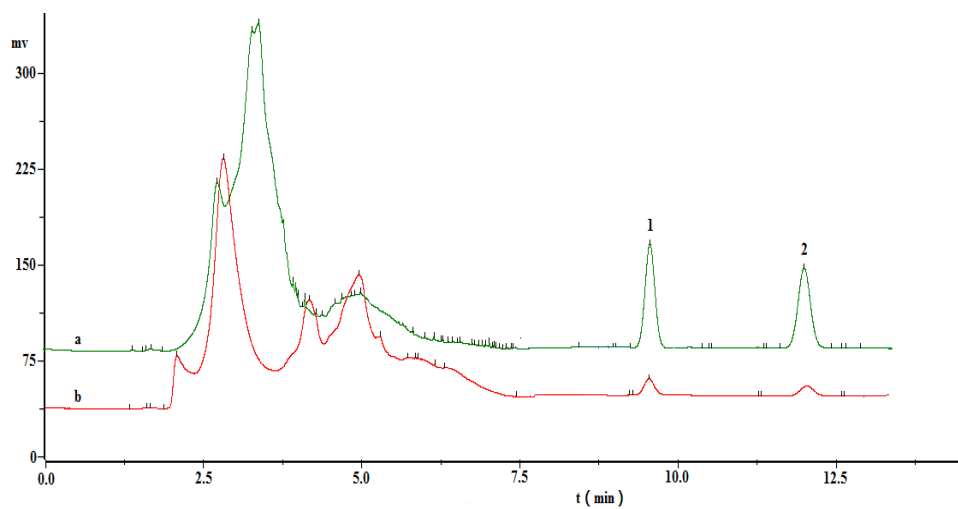

Supplemental Fig. S2. HPLC chromatograms of spiked chlorpyrifos-methyl (1) and chlorpyrifos (2). water sample: (a) spiked water of  $0.4 \text{ mg L}^{-1}$  after CPE. (b) spiked water of  $0.4 \text{ mg L}^{-1}$  before CPE.
