# Supplementary material for: Analysis of chlorpyrifos and chlorpyrifos-methyl residues in multi-environmental media by cloud-point extraction and HPLC
Source: Royal Society of Chemistry journal article supplement (doi:10.1039/c3ay26623k), 2013-01-01
Supplement: c3ay26623k_2.pdf [file c3ay26623k_2.pdf]

### Supplemental Table S1

#### Features of analytic method of HPLC for chlorpyrifos and chlorpyrifos-methyl

| Analytic methods | Pesticides              | Linear range (mg/L) | Linear equation (mg/L)         | Correlation coefficient ( $R^2$ ) | LOD ( $\mu\text{g/L}$ ) |
|------------------|-------------------------|---------------------|--------------------------------|-----------------------------------|-------------------------|
| HPLC             | Chlorpyrifos            | 0.1~8.0             | $y = 1348040.2072x - 95423.8$  | 0.9996                            | 10                      |
|                  | Chlorpyrifos<br>-methyl | 0.1~8.0             | $y = 1657520.7678x - 121485.7$ | 0.9994                            | 5                       |
| CPE-HPLC         | Chlorpyrifos            | 0.1~1.0             | $y = 712745.6723x - 189706.5$  | 0.9893                            | 1.28                    |
|                  | Chlorpyrifos<br>-methyl | 0.1~1.0             | $y = 770317.5789x - 133011.8$  | 0.9917                            | 0.84                    |
